# Supplementary material for: Salvianolic Acid B Prevents Arsenic Trioxide-Induced CardiotoxicityIn Vivoand Enhances Its Anticancer ActivityIn Vitro
Source: Hindawi journal article supplement (doi:10.1155/2013/759483), 2013-01-01

## Supplementary Data

**Supplementary Data 1** Effects of Sal B treatment on SOD and GPx expressions in heart tissue in vivo. Western blotting was performed on harvested ventricular tissue from mice after 2 weeks of treatment with ATO, Sal B, or both. Data are representative of three different experiments. \*\*P < 0.01 versus control; #p<0.05 versus ATO-treated mice.

**Supplementary Data 2** Effects of Sal B and ATO treatment on Akt and Bcl-2/Bax protein expression levels in vitro. Western blotting was performed on HepG 2 (A) and HeLa (B) cells treated with ATO, Sal B, or both (4  $\mu$ M ATO, 10  $\mu$ M Sal B) for 48 h. Quantitative analyses of the ratio of p-Akt to Akt and the ratio of Bcl-2 to Bax in protein expression were evaluated, respectively. The data are expressed as means  $\pm$ SD from three independent experiments. \*p<0.05 versus control; \*\*P < 0.01 versus control; #P < 0.05 versus ATO-treated cells.

**Supplementary Data 3** Effects of Sal B and ATO treatment on the cell viability of normal H9c2 cardiomyoblast cells. H9c2 cells were treated with ATO (4  $\mu$ M) in presence or absence with Sal B (10  $\mu$ M) for 48 h, respectively. Cell viability was determined by MTT assay (expressed as the percentage of control in each cell line). The data are expressed as means  $\pm$ SD from three independent experiments. \*\*P < 0.01 versus control; ##P < 0.01 versus ATO-treated cells.

**Supplementary Data 4** Effects of Sal B and Sal B and ATO combination treatment on the cell viability of cancer cells. HepG 2 (A) and HeLa (B) cells were incubated with increasing concentrations of Sal B (0  $\mu$ M to 100  $\mu$ M) for 48 h. HepG 2 (C) and HeLa (D) cells were treated with different concentrations of ATO (0-8  $\mu$ M) in presence or absence with Sal B (10  $\mu$ M) for 48 h, respectively. Cell viability was determined by MTT assay (expressed as the percentage of control in each cell line). The data are expressed as means  $\pm$ SD from three independent experiments. \*\*P < 0.01 versus control; #P < 0.05 versus ATO-treated cells.

Supplementary Data 1

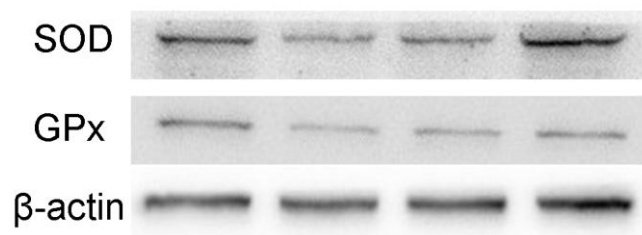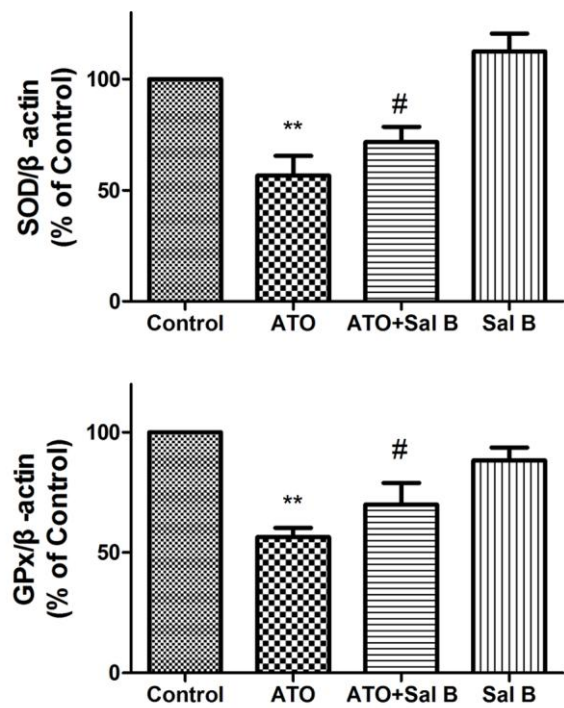

## Supplementary Data 2

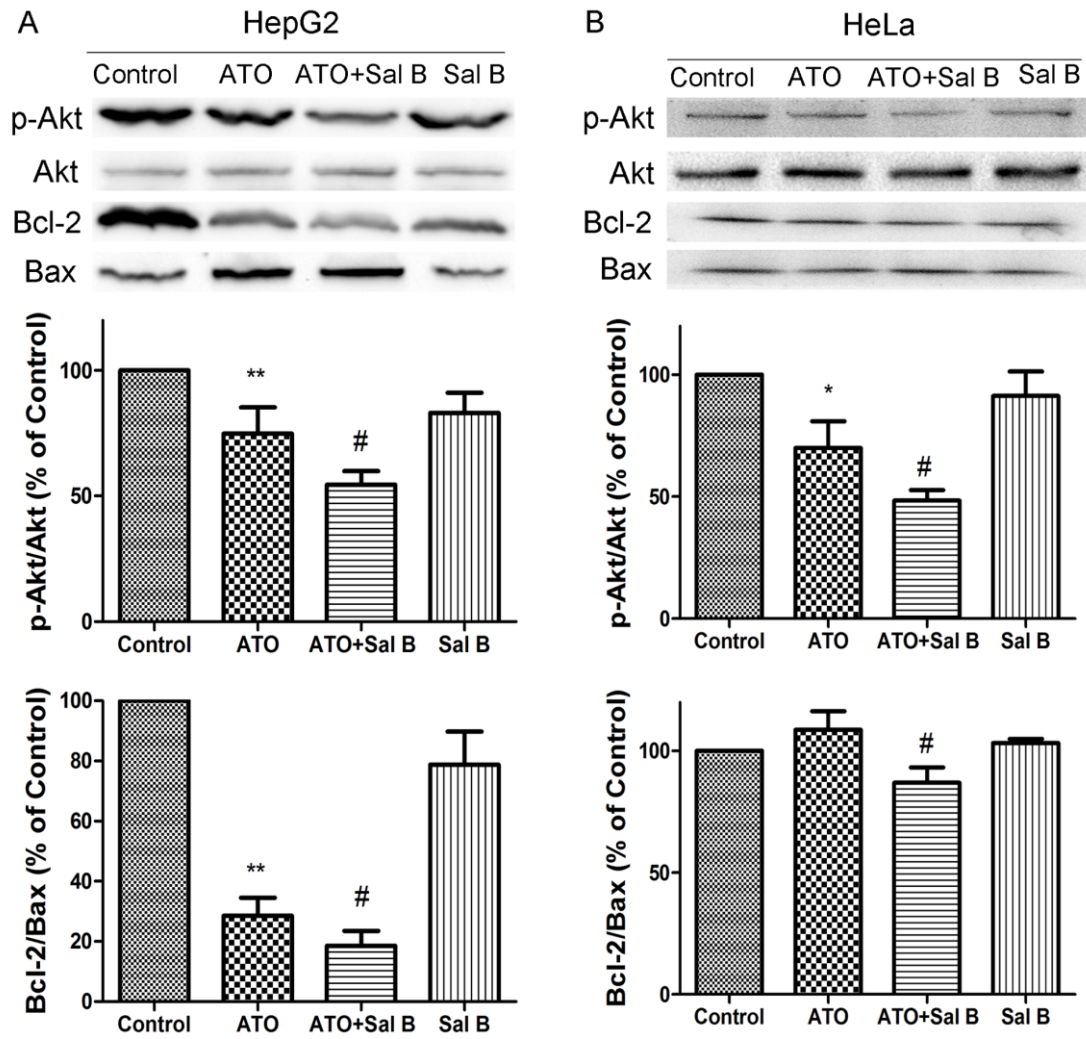

Supplementary Data 3

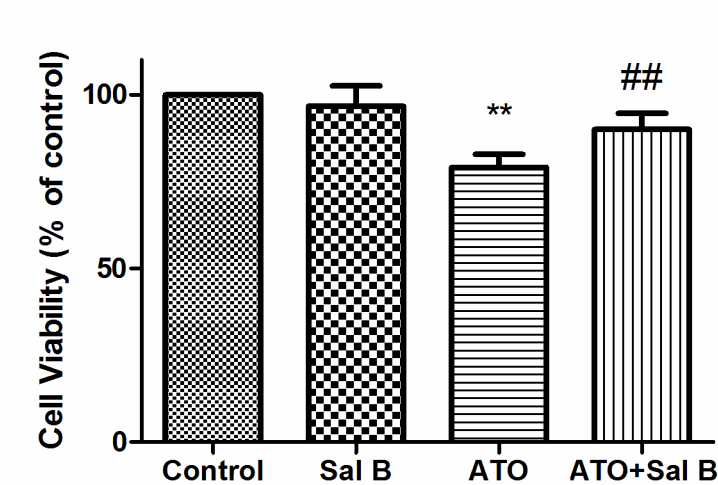

# Supplementary Data 4

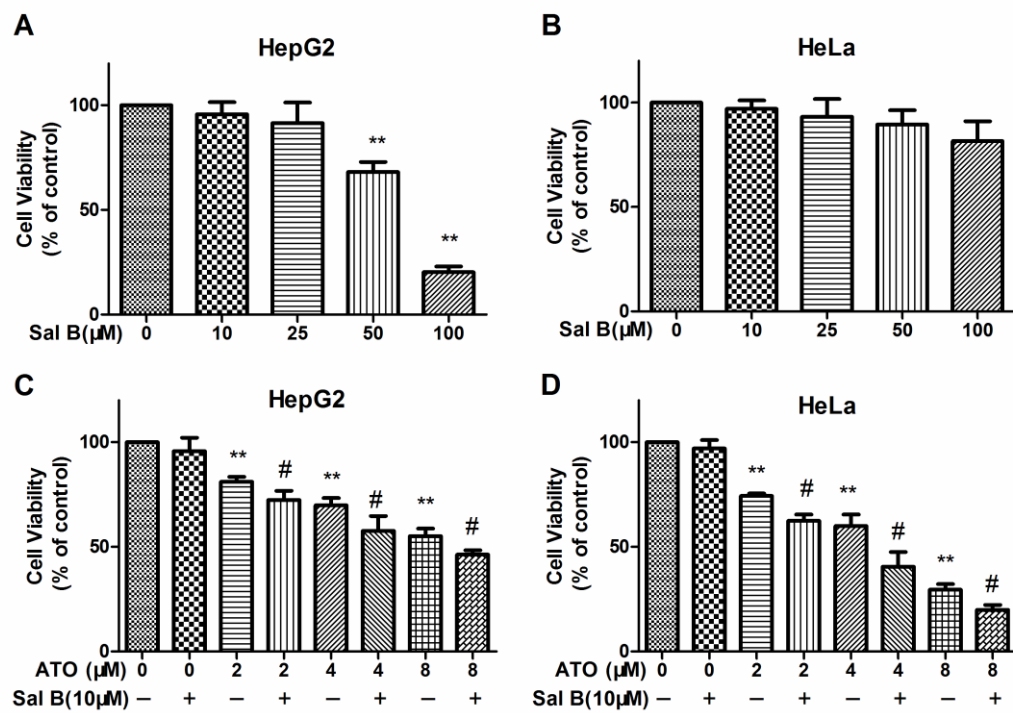

Supplement: f1 [file 759483.f1.pdf]
